# Supplementary material for: The rice ERF transcription factor OsERF922 negatively regulates resistance to Magnaporthe oryzae and salt tolerance
Source: PubMed Central journal article supplement — J Exp Bot. 2012 Mar 21;63(10):3899–911. doi: 10.1093/jxb/ers079 (PMC3388842; doi:10.1093/jxb/ers079), 2012-03-21
Supplement: supp_ers079_00076398-file001.pdf [file supp_ers079_00076398-file001.pdf]

**The rice ERF transcription factor *OsERF922* negatively regulates  
resistance to *Magnaporthe oryzae* and salt tolerance**

*Dongfeng Liu, Xujun Chen, Jiqin Liu, Jianchun Ye, and Zejian Guo*

**Supplementary Material**

Supplemental Table 1. Primers used in the QRT-PCR

| Primer Name              | Primer Sequence (5'-3')   |
|--------------------------|---------------------------|
| <i>UBQ</i> Forward:      | AACCAGCTGAGGCCCAAGA       |
| <i>UBQ</i> Reverse:      | ACGATTGATTTAACCAGTCCATGA  |
| <i>OsERF922</i> Forward: | AGGCGCTGCTCAACTTCCCG      |
| <i>OsERF922</i> Reverse: | CACGCACTCACCGTCGCTCA      |
| <i>Pr1a</i> Forward:     | GTCTTCATCACCTGCAACTACTC   |
| <i>Pr1a</i> Reverse:     | CATGCATAAACACGTAGCATAGC   |
| <i>rab16a</i> Forward:   | CACACCACAGCAAGAGCTAAGTG   |
| <i>rab16a</i> Reverse:   | TGGTGCTCCATCCTGCTTAAG     |
| <i>Pr1b</i> Forward:     | CGATCAGCGCCCTTACTAGC      |
| <i>Pr1b</i> Reverse:     | ACACACAATCCGGCTACATAGAT   |
| <i>Pr10</i> Forward:     | GACATCGTGGATGGCTACTATGG   |
| <i>Pr10</i> Reverse:     | TCACTCACTCTAGGTGGGATATAC  |
| <i>PAL</i> Forward:      | GCGATCGGTAAGCTCATGTT      |
| <i>PAL</i> Reverse:      | CCTTGAAGCCGTAGTCCAAG      |
| <i>OsCPS2</i> Forward:   | GAATTCGCAGCAAGCACCAGC     |
| <i>OsCPS2</i> Reverse:   | GCGGCCGCCTAATTGACATCCTCGA |
| <i>OsCPS4</i> Forward:   | GAATTCGGATGAACTAAGAGAGA   |
| <i>OsCPS4</i> Reverse:   | GCGGCCGCTTATAAGGAGTGTAG   |
| <i>OsNCED3</i> Forward:  | ACGTGATCAAGAAGCCGTACCT    |
| <i>OsNCED3</i> Reverse:  | GCTGGTCGAGCGGGATCT        |
| <i>OsNCED4</i> Forward:  | GCCGAGACACGCATTGG         |
| <i>OsNCED4</i> Reverse:  | GTGAAGGTGGCGACAGCAA       |

Supplemental Figure 1. *OsERF922* sequences and phylogenetic analysis

**A**

```

                                     cacactgcaaaccactctctcggtctctc
1      catccatccacctctctctcgatcgtctcatgagctagcgcgccccgcggtacageccccgc
1      ATGTCTCTCTCCTTGGGGTTTAGCGCCGGCGCCGGCTCGGTGCCGATCGCCTCGCCGCC
      M S L S L G F S A G A G V G A D R L A A

61     GCGCCCGCGCTCCAGGCCGCCGGTGCTCTGCCGCCACGCGTGGACGTGTCTCTGTCTGCTG
21     A P A L Q A A G A L P P R V D V S L S L

121    GCGCGCGCGCCAACGGGCAGCCGTCGTCGTACCTCCCGCTCAACGAGAACGACTCGCTG
41     A R A A N G Q P S S Y L P L N E N D S L

181    GACATGGTCCTCTTCGACGTCCTCCGCGAGGCCCTCCGCGGTGGCGGCGCTGTCTGTCGTCG
61     D M V L F D V L R E A S A V A A L S S S

241    TCGTCGTCGTCGCCGAGCTGGGCGCGCGGACGACGGCGCCGGTGGTCGCCGCCACCCC
81     S S S S P E L G A R T T A P V V A G H P

301    GCCGGGCGCAAGGGTGGCGGGCGGAGGCCGAGGCAGGGGAGCGGCGGAGGGGCGGC
101    A G R K G G G G G G R G A A A R G G

361    GCCGCTGGCGGGCGGCACTACCGCGGTGTGAGGCGGCGCCGTGGGGGAAGTACGCCGCG
121    A A G G R H Y R G V R R R P W G K Y A A

421    GAGATCCGTGACCCGACGCGGCACGGCGCGCGGCTGTGGCTCGGCACCTTCGGCACGGCC
141    E I R D P T R H G A R L W L G T F G T A

481    GAGGAGCCGCCGCGGCGTACGACCGCGCCGTTCCGCATGCGGGGCGCCAAGGCGCTG
161    E E A A A A Y D R A A F R M R G A K A L

541    CTCAACTTCCCGCCGGCTGTCTGCCGGTACGGCGCCCGTCCGCGGCGCCGCCGCGGCGCG
181    L N F P P A V A G D G A R R G A A A A A

601    AAGCAGGTCGGCATGAGCGACGGTGAGTGCGTGATATAG
201    K Q V G M S D G E C V I *

```

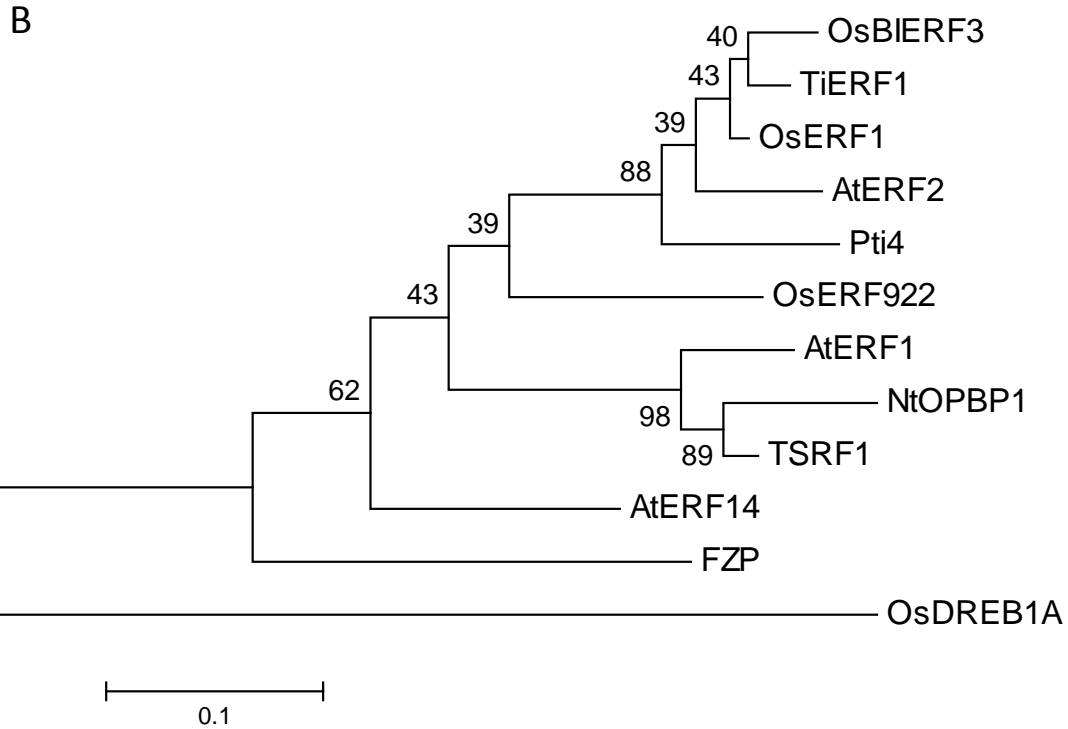

Supplemental Figure 1. *OsERF922* sequences and phylogenetic analysis

(A) The nucleotide sequence of *OsERF922* cDNA and its deduced amino-acid sequence. The 5'-untranslated region is italicized. The residues forming the ERF domain are in bold and shaded, including the conserved amino-acid residues.

(B) The phylogenetic tree of *OsERF922* with close homologs from a BLAST search. The deduced amino-acid sequence of *OsERF922* was aligned with some of the published members of ERF using the CLUSTAL W program and the phylogenetic tree was drawn using the TREEVIEW program to produce a neighbor-joining tree of the full-length amino-acid sequences from ERF proteins. The GenBank accession numbers are listed in brackets for each of the following ERF proteins: *OsBIERF3*(AAV98702), *AtERF1*(AY086078), *AtERF2*(BAA32419), *Pti4*(T07686), *TSRF1*(AF49420), *OsERF1*(ABK34954), *OsERF922* (BAB67922), *NtOPBP1* (U81157), *TiERF1*(ABQ52686), *AtERF14*(P93822), *FZP*(BAJ09616), *OsDREB1A*(AAN02486).
